# Supplementary material
Source: PubMed Central journal article supplement (PMC8027922)

Fig. 1A

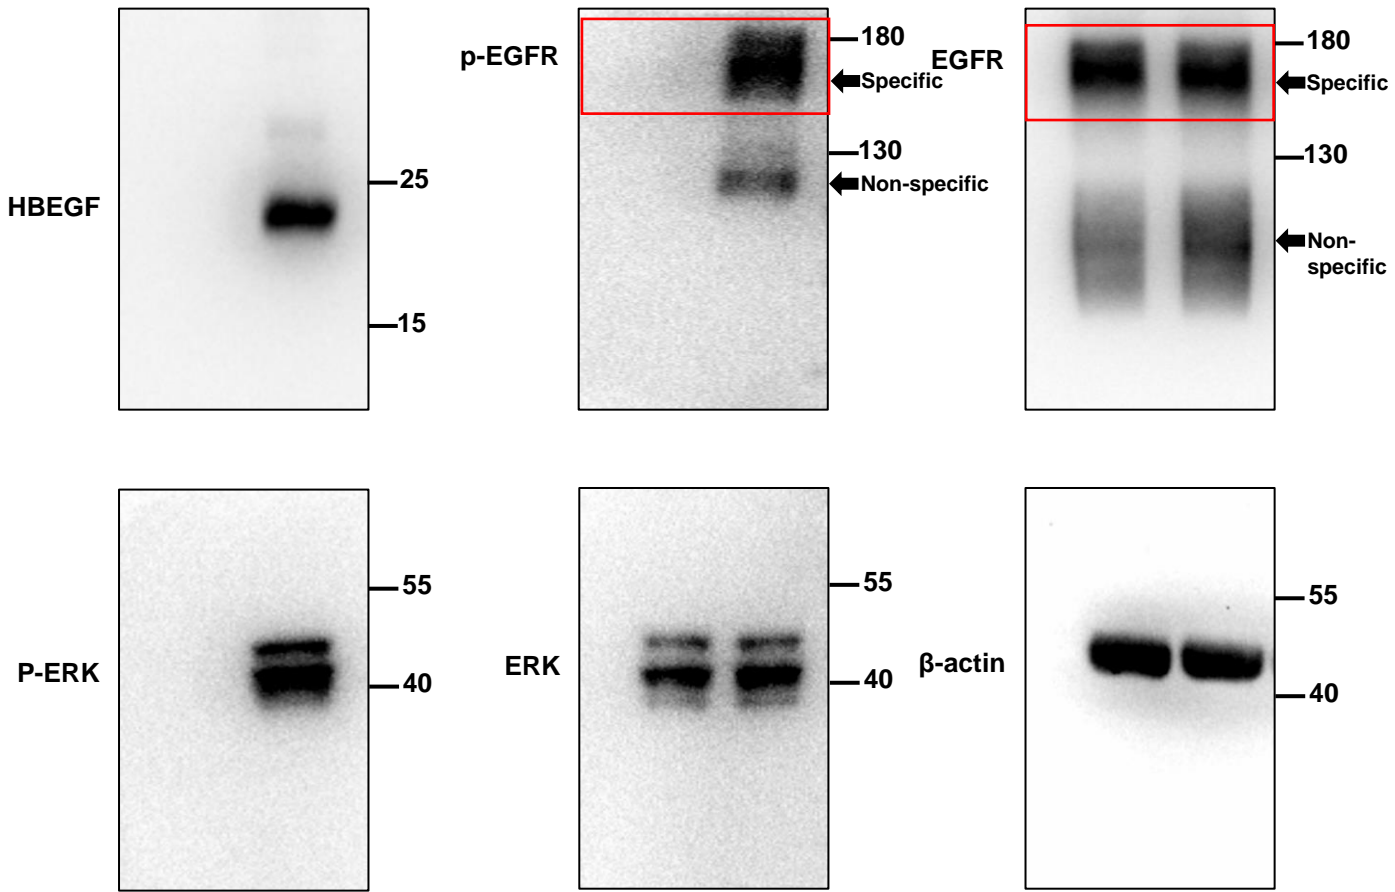

Fig. 5G

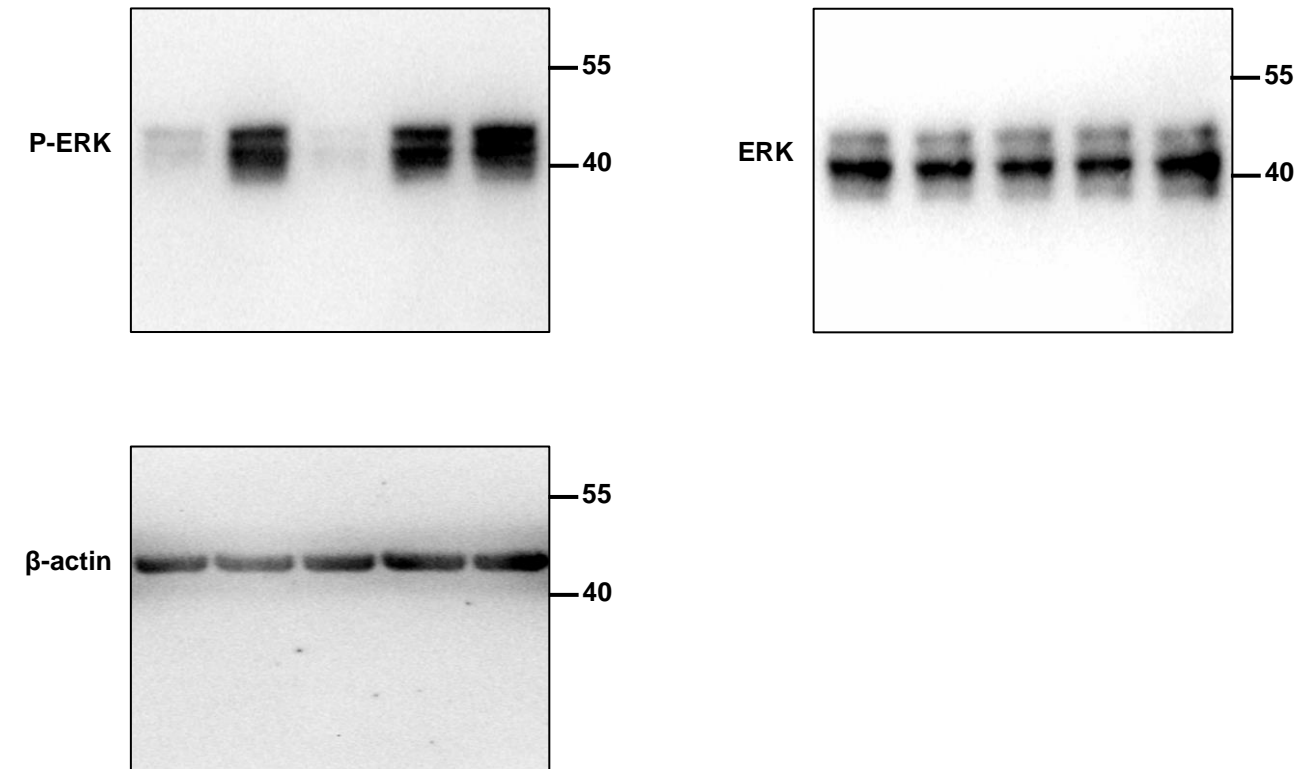

**fig. S7A**

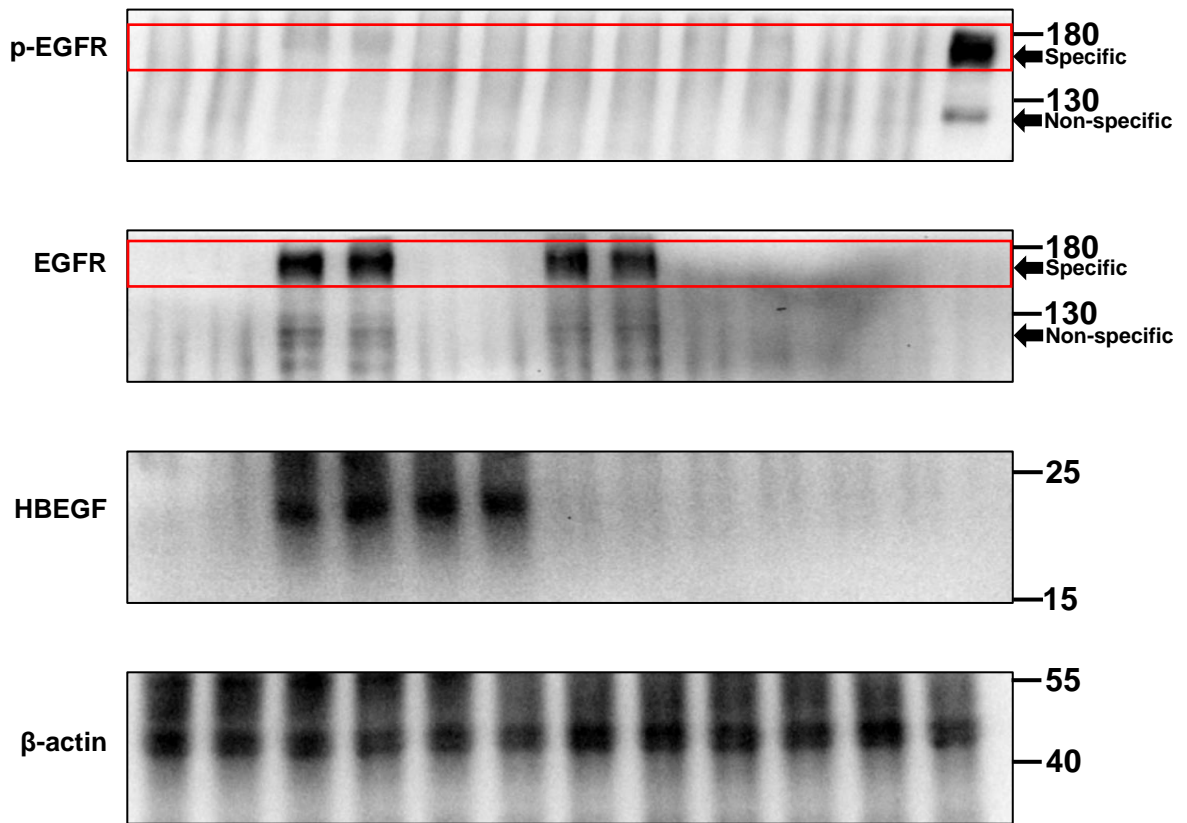

**fig. S18B**

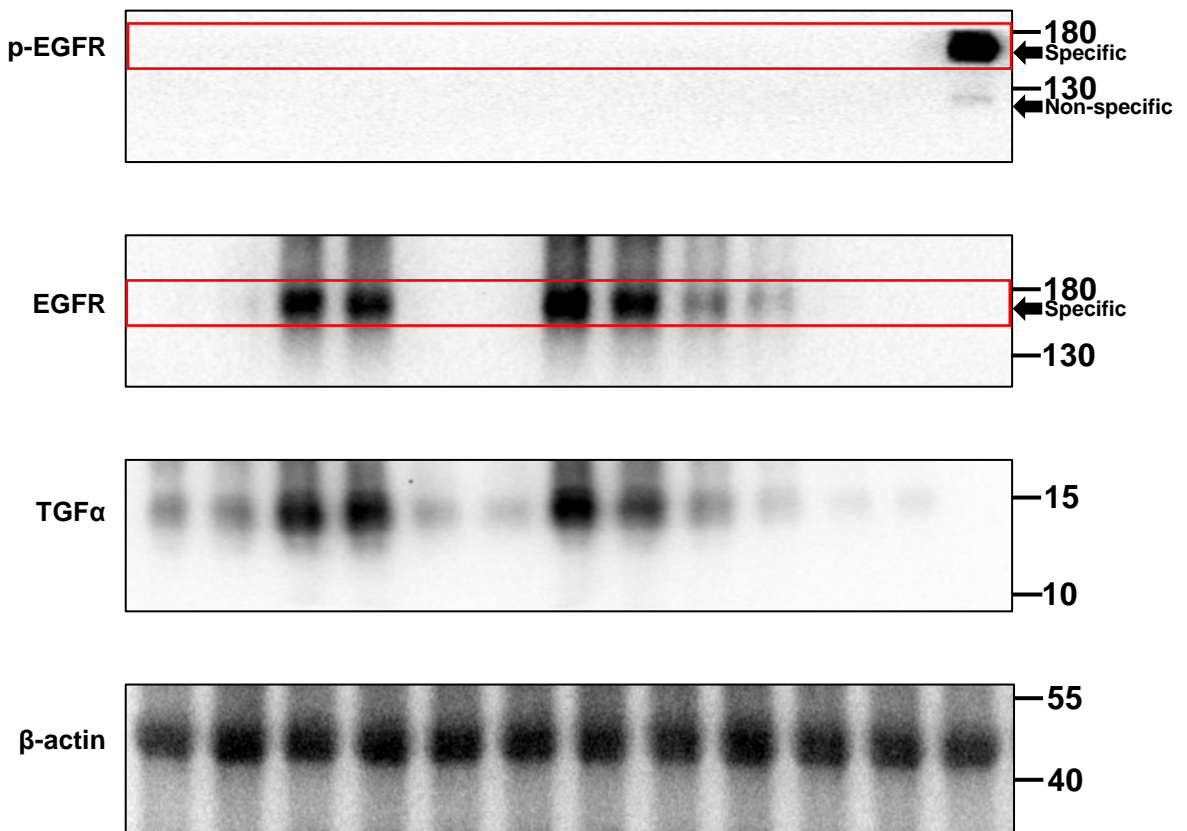

Supplement: NIHMS1687453-supplement-File_S2.pdf [file NIHMS1687453-supplement-File_S2.pdf]
